# Supplementary material for: Responses of Phaseolus calcaltus to lime and biochar application in an acid soil
Source: PeerJ. 2019 Feb 12;7:e6346. doi: 10.7717/peerj.6346 (PMC6376937; doi:10.7717/peerj.6346)
Supplement: Data S1 — Data of all parameters with four replicates. [file peerj-07-6346-s001.xlsx]

## Sheet: Sheet1
		Nodule				Soil parameters												Plant parameters
		Number	Dry Wt.	mean Wt		pH	Al3+（mg/kg）	Al3+ cmol/kg	Urease	Dehydrogenase	MBC	MBN	C/N	AP mg/kg	AK mg/kg	AN mg/kg		Aboveground Biomass	Belowground biomass	R/S	Total Biomass	Photosynthesis	Stomatal con.	Internal Co2	Transpiration	N g/kg	P g/kg	K mg/g	Al μg/g	N mg/pot	P mg/pot	K mg/pot	Alμg/pot
Lime 0	Biochar 0	0	0	0		5.46	947.704	3.51001	299.82	0.79	174.9	7.59631	23.0243	38.3866	130	56		4.6	3.47	0.754348	8.07	5.37	0.18	314	2.73	28	2.28446	39.75	92.17	128.8	10.5085	182.85	423.982
	Biochar 0	0	0	0		5.5	921.646	3.4135	330.37	1.21	176.741	12.5313	14.1039	39.0399	135	63		4.5	3.2	0.711111	7.7	6.24	0.14	289	2.5	24.805	1.87599	51.5	90.8664	111.623	8.44196	231.75	408.899
	Biochar 0	0	0	0		5.48	865.187	3.2044	348.29	0.88	174.9	12.7924	13.6722	39.4755	145	56		3.9	3.15	0.807692	7.05	6.71	0.29	335	3.65	26.855	1.52587	42.5	91.5182	104.734	5.9509	165.75	356.921
	Biochar 0	0	0	0		5.52	932.504	3.45372	323.44	0.94	197.534	5.06421	39.0059	39.1125	155	56		4.3	3.42	0.795349	7.72	4.5	0.11	309	2.24	32.8	2.22611	45	88.911	141.04	9.57227	193.5	382.317
	Biochar 1	0	0	0		5.52	730.554	2.70576	331.18	0.82	361.084	12.7924	28.2264	39.3303	195	112		4.5	3.51	0.78	8.01	5.28	0.16	296	2.22	34.85	2.05105	39	53.062	156.825	9.22973	175.5	238.779
	Biochar 1	0	0	0		5.47	689.295	2.55295	352.77	0.97	349.8	12.6605	27.6292	38.6044	205	98		4.1	3.11	0.758537	7.21	4.93	0.1	304	1.59	29.725	1.35081	54.25	51.1066	121.873	5.53833	222.425	209.537
	Biochar 1	0	0	0		5.61	737.068	2.72988	384.96	1.06	353.482	12.5313	28.2079	39.8384	210	98		5.1	3.67	0.719608	8.77	6.55	0.15	299	2.34	20.295	1.87599	50.75	54.3656	103.504	9.56755	258.825	277.265
	Biochar 1	0	0	0		5.55	697.981	2.58512	320.59	0.79	176.741	12.6614	13.959	38.6044	190	49		3.8	3.05	0.802632	6.85	5.76	0.18	319	2.71	20.295	1.75928	25.75	55.0174	77.121	6.68528	97.85	209.066
	Biochar 2	30	1	0.333333		5.9	743.583	2.75401	372.33	1.34	349.8	12.6605	27.6292	40.9999	240	84		4.2	3.4	0.809524	7.6	7.7	0.14	315	2.68	34.85	2.28446	33	41.9814	146.37	9.59474	138.6	176.322
	Biochar 2	80	4.6	0.575		6.02	719.697	2.66554	393.1	1.41	342.661	25.5848	13.3932	42.1613	250	91		4.6	3.46	0.752174	8.06	7.76	0.21	328	3.44	36.285	2.57623	34.5	58.2764	166.911	11.8506	158.7	268.071
	Biochar 2	0	0	0		5.84	697.981	2.58512	365.81	1.07	353.482	26.1292	13.5283	41.871	245	70		4.63333	2.8	0.604317	7.43333	5.93	0.13	307	2.67	35.7	2.57623	42.5	42.6332	165.41	11.9365	196.917	197.534
	Biochar 2	0	0	0		5.6	687.124	2.5449	359.7	1.03	353.482	12.6605	27.92	41.508	255	91		4.6	3.5	0.76087	8.1	6.03	0.12	307	2.54	36.69	2.63458	45	45.2404	168.774	12.1191	207	208.106
Lime 1	Biochar 0	90	4.2	0.466667		5.74	576.378	2.13473	344.63	0.93	176.741	12.7924	13.8161	37.5155	135	42		4.7	3.43	0.729787	8.13	9.3	0.27	323	3.97	39.155	2.34282	33	58.2764	184.029	11.0112	155.1	273.899
	Biochar 0	60	3.6	0.6		5.63	559.005	2.07039	349.51	0.99	174.9	13.3486	13.1025	38.0962	170	42		4.5	3.38	0.751111	7.88	9.6	0.3	328	4.01	28.7	1.75928	49.75	60.8836	129.15	7.91678	223.875	273.976
	Biochar 0	0	0	0		5.59	602.436	2.23124	368.25	1.05	176.741	13.0227	13.5718	37.2977	140	35		4.3	3.41	0.793023	7.71	8.28	0.23	329	3.54	37.515	1.87599	35.25	55.6692	161.315	8.06676	151.575	239.378
	Biochar 0	0	0	0		5.71	569.863	2.1106	362.55	0.89	176.741	12.9271	13.6722	37.8059	160	49		4.7	3.52	0.748936	8.22	10.09	0.27	361	3.74	36.49	1.87599	34.5	52.4102	171.503	8.81716	162.15	246.328
	Biochar 1	210	6.9	0.328571		5.8	498.204	1.8452	402.06	1.13	530.223	12.6605	41.8801	35.0474	195	70		5.4	3.84	0.711111	9.24	8.61	0.14	365	6.09	41.615	2.22611	39.25	47.8476	224.721	12.021	211.95	258.377
	Biochar 1	50	2.3	0.46		5.69	478.66	1.77281	372.33	0.97	692.388	25.8541	26.7806	35.6282	205	63		4.5	3.25	0.722222	7.75	9.22	0.32	338	4.03	45.1	2.51788	42.25	47.1958	202.95	11.3304	190.125	212.381
	Biochar 1	70	2.9	0.414286		5.77	485.175	1.79694	356.85	1.04	530.223	25.5848	20.7242	35.3378	210	77		4.1	3.2	0.780488	7.3	8.95	0.26	317	3.55	43.05	1.70093	51.5	53.7138	176.505	6.97382	211.15	220.227
	Biochar 1	0	0	0		5.75	509.462	1.8869	375.99	1.27	519.291	12.6605	41.0165	35.7733	190	70		4.8	3.46	0.720833	8.26	10.48	0.27	331	3.7	43.575	2.22611	49	49.1512	209.16	10.6853	235.2	235.926
	Biochar 2	150	5.1	0.34		6.1	446.087	1.65218	364.18	1.22	530.223	25.5848	20.7242	36.6444	215	84		4.7	3.51	0.746809	8.21	10.54	0.19	321	2.87	34.44	2.40117	40.75	53.7138	161.868	11.2855	191.525	252.455
	Biochar 2	110	4.5	0.409091		6.01	443.916	1.64413	443.62	1.13	645.785	25.321	25.5039	36.9348	210	98		4.5	3.4	0.755556	7.9	10.53	0.33	341	3.89	35.875	2.9847	42.25	47.8476	161.438	13.4312	190.125	215.314
	Biochar 2	90	4	0.444444		5.72	428.716	1.58784	394.32	0.94	699.6	25.5848	27.3444	36.5718	205	84		5.2	3.59	0.690385	8.79	9.72	0.29	341	3.79	36.125	3.10141	45.75	45.2404	187.85	16.1273	237.9	235.25
	Biochar 2	240	8.1	0.3375		5.78	452.602	1.6763	397.18	1.05	714.485	39.1937	18.2296	36.7896	210	77		5.2	3.71	0.713462	8.91	9.86	0.21	311	3.18	38.335	2.86799	39.5	47.1958	199.342	14.9136	205.4	245.418
Lime 2	Biochar 0	50	2.4	0.48		6.41	287.57	1.06507	387.81	0.98	530.223	25.321	20.94	32.9423	135	42		4.7	3.38	0.719149	8.08	10.73	0.22	344	0.31	66.215	1.70093	36	34.8116	311.211	7.99438	169.2	163.615
	Biochar 0	40	1.8	0.45		6.27	278.882	1.0329	395.683	1.11	524.7	13.0646	40.162	31.7808	135	56		5.5	4.02	0.730909	9.52	11.04	0.39	328	4.04	77.08	2.45952	41.25	45.2404	423.94	13.5274	226.875	248.822
	Biochar 0	140	4.9	0.35		6.34	294.082	1.08919	395.14	0.83	530.223	26.9906	19.6448	32.4341	150	49		5.4	3.88	0.718519	9.28	11.07	0.37	323	3.97	63.55	1.46752	34.5	42.6332	343.17	7.9246	186.3	230.219
	Biochar 0	0	0	0		6.17	265.853	0.984641	404.1	0.89	528.382	22.9271	23.0462	32.0712	140	56		5.2	4.14	0.796154	9.34	10.35	0.74	360	4.82	53.095	1.93434	54.25	43.285	276.094	10.0586	282.1	225.082
	Biochar 1	280	7.4	0.264286		6.19	183.336	0.679022	414.29	1.79	874.5	25.8541	33.8244	35.9911	180	56		6.8	4.09	0.601471	10.89	10.62	0.35	317	3.77	57.4	1.70093	40	39.3742	390.32	11.5663	272	267.745
	Biochar 1	190	6.1	0.321053		6.28	202.88	0.751406	414.29	1.54	706.964	20.2568	34.9	35.7007	185	70		7.1	4.33	0.609859	11.43	12.44	0.5	350	4.25	62.115	2.34282	37.75	39.3742	441.017	16.634	268.025	279.557
	Biochar 1	160	6.2	0.3875		6.26	203.603	0.754086	442.8	1.62	699.6	37.594	18.6094	35.7733	175	63		7.13333	3.27	0.458411	10.4033	10.38	0.21	319	2.8	54.325	3.10141	42.25	40.6778	387.518	22.1234	301.383	290.168
	Biochar 1	0	0	0		6.43	224.595	0.831831	394.32	1.48	706.964	25.5848	27.6322	36.717	195	56		7.5	3.55	0.473333	11.05	10.15	0.23	309	3.19	55.965	3.04305	44	40.026	419.738	22.8229	330	300.195
	Biochar 2	220	6.3	0.286364		6.65	85.6185	0.317106	559.31	1.31	1224.3	25.321	48.3511	31.3453	210	70		6.2	3.16	0.509677	9.36	12.6	0.53	358.66	5.406	66.97	1.75928	37.75	39.3742	415.193	10.9076	234.05	244.12
	Biochar 2	80	2.9	0.3625		6.61	105.162	0.389489	405.73	1.28	1049.4	38.3772	27.3444	31.926	210	77		6.7	4.06	0.60597	10.76	11.62	0.52	389	7.68	52.685	1.64258	47	41.9814	352.99	11.0053	314.9	281.275
	Biochar 2	30	1.1	0.366667		6.54	79.104	0.292978	483.13	1.44	1237.19	25.321	48.8601	32.2164	215	70		6.2	3.72	0.6	9.92	12.95	0.7	349	4.78	71.75	1.87599	47	43.285	444.85	11.6311	291.4	268.367
	Biochar 2	160	7.6	0.475		6.38	81.2755	0.30102	461.54	1.61	1060.45	38.3772	27.6322	31.6356	205	77		5.7	3.46	0.607018	9.16	13.23	0.36	338	3.76	76.465	2.1094	52.25	42.6332	435.851	12.0236	297.825	243.009
														0
0	0	0	0	0		5.49	916.76	3.39541	325.48	0.955	181.019	9.49606	22.4516	39.0036	141.25	57.75		4.325	3.31	0.767125	7.635	5.705	0.18	311.75	2.78	28.115	1.97811	44.6875	90.8664	121.549	8.61841	193.463	393.03
	5	0	0	0		5.5375	713.725	2.64343	347.375	0.91	310.277	12.6614	24.5056	39.0944	200	89.25		4.375	3.335	0.765194	7.71	5.63	0.1475	304.5	2.215	26.2913	1.75928	42.4375	53.3879	114.831	7.75522	188.65	233.662
	10	27.5	1.4	0.227083		5.84	712.096	2.63739	372.735	1.2125	349.856	19.2587	20.6177	41.6351	247.5	84		4.50833	3.29	0.731721	7.79833	6.855	0.15	314.25	2.8325	35.8813	2.51788	38.75	47.0329	161.866	11.3752	175.304	212.508
0.75	0	37.5	1.95	0.266667		5.6675	576.92	2.13674	356.235	0.965	176.281	13.0227	13.5406	37.6788	151.25	42		4.55	3.435	0.755714	7.985	9.3175	0.2675	335.25	3.815	35.465	1.96352	38.125	56.8098	161.499	8.95298	173.175	258.395
	5	82.5	3.025	0.300714		5.7525	492.875	1.82546	376.808	1.1025	568.031	19.19	32.6003	35.4467	200	70		4.7	3.4375	0.733664	8.1375	9.315	0.2475	337.75	4.3425	43.335	2.16776	45.5	49.4771	203.334	10.2526	212.106	231.728
	10	147.5	5.425	0.382759		5.9025	442.83	1.64011	399.825	1.085	647.523	28.9211	22.9505	36.7352	210	85.75		4.9	3.5525	0.726553	8.4525	10.1625	0.255	328.5	3.4325	36.1938	2.83882	42.0625	48.4994	177.624	13.9394	206.238	237.109
1.5	0	57.5	2.275	0.32		6.2975	281.597	1.04295	395.683	0.9525	528.382	22.0758	25.9483	32.3071	140	50.75		5.2	3.855	0.741183	9.055	10.7975	0.43	338.75	3.285	64.985	1.89058	41.5	41.4926	338.604	9.87623	216.119	216.935
	5	157.5	4.925	0.24321		6.29	203.603	0.754086	416.425	1.6075	747.007	27.3224	28.7415	36.0456	183.75	61.25		7.13333	3.81	0.535769	10.9433	10.8975	0.3225	323.75	3.5025	57.4513	2.54705	41	39.8631	409.648	18.2866	292.852	284.416
	10	122.5	4.475	0.372633		6.545	87.79	0.325148	477.428	1.41	1142.83	31.8491	38.0469	31.7808	210	73.5		6.2	3.6	0.580666	9.8	12.6	0.5275	358.665	5.4065	66.9675	1.84681	46	41.8184	412.221	11.3919	284.544	259.193
		SE	SE	SE		SE	SE		SE	SE	SE	SE	SE	SE	SE	SE		SE	SE	SE	SE	SE	SE	SE	SE	SE	SE	SE	SE	SE	SE	SE	SE
		0	0	0		0.0129099	18.0024	0.0666756	10.0283	0.0904157	5.52218	1.9002	5.92407	0.226665	5.54339	1.75		0.154785	0.0792675	0.0218767	0.212701	0.488237	0.03937	9.44612	0.306784	1.69573	0.175666	2.51117	0.704024	8.23478	0.984426	13.9837	14.8
		0	0	0		0.0292617	11.8068	0.0437287	14.2052	0.0636396	44.5738	0.0532915	3.51827	0.301311	4.56435	13.8165		0.280995	0.1513	0.0176617	0.428486	0.35069	0.0170171	5.10718	0.23297	3.61655	0.148772	6.44801	0.86225	16.7417	0.979714	34.7405	16.1099
		18.8746	1.0924	0.14008		0.0883176	12.4901	0.0462595	7.26157	0.0952519	2.55058	3.81111	4.13259	0.250369	3.22749	4.94975		0.103078	0.164621	0.0443031	0.166341	0.505742	0.0204124	4.95606	0.204995	0.399314	0.0790105	2.94746	3.8134	5.21103	0.596134	16.0588	19.6646
		22.5	1.13248	0.156347		0.0347311	9.22888	0.034181	5.50864	0.035	0.460263	0.118459	0.154411	0.173751	8.26009	2.85774		0.0957427	0.0301386	0.013327	0.116512	0.382238	0.0143614	8.68308	0.109278	2.32082	0.12939	3.90312	1.81209	11.7408	0.71379	17.0424	9.08491
		44.9768	1.43491	0.103873		0.0232289	6.86103	0.0254112	9.38397	0.064727	41.5322	3.77019	5.2588	0.16096	4.56435	2.85774		0.273861	0.145509	0.0158025	0.416541	0.407891	0.0381608	10.0778	0.591064	0.719517	0.170127	2.85591	1.46956	10.0469	1.12645	9.20795	10.1422
		33.2603	0.919579	0.0264184		0.0907722	5.05389	0.0187181	16.3958	0.0595119	41.7914	3.42478	2.10297	0.08048	2.04124	4.40407		0.177951	0.0653676	0.0150858	0.239318	0.216963	0.0330404	7.5	0.244485	0.804514	0.153466	1.3516	1.82426	9.51532	1.04233	11.1029	8.07778
		29.5452	1.01273	0.110227		0.0512144	6.10198	0.0225999	3.33073	0.060879	1.30182	3.11733	4.78948	0.250369	3.53553	3.35099		0.177951	0.167008	0.0185439	0.328976	0.167798	0.110076	8.38028	1.0102	4.9264	0.212242	4.48957	2.29484	31.5713	1.31385	25.0994	18.4903
		58.3631	1.66802	0.0848893		0.0504975	8.42574	0.0312065	9.97241	0.0672526	42.5331	3.65836	3.73781	0.232168	4.26956	3.35099		0.143372	0.242899	0.0405056	0.212655	0.523042	0.0667551	9.01272	0.319045	1.67669	0.330525	1.35785	0.312025	12.7445	2.63299	14.4451	6.97385
		42.106	1.4991	0.038794		0.0595119	5.9469	0.0220255	31.7939	0.0751665	50.8731	3.76899	6.09721	0.187429	2.04124	2.02073		0.204124	0.191311	0.0237134	0.358143	0.351165	0.0694472	10.957	0.830274	5.14024	0.0996569	3.01558	0.857103	20.6966	0.264629	17.5464	9.40258
